# Supplementary material for: The prevalence of depression and associated risk factors among medical students: An untold story in Vietnam
Source: PubMed Central journal article supplement (PMC6701769; doi:10.1371/journal.pone.0221432), 2019-08-20
Supplement: pone.0221432.s002.pdf [file pone.0221432.s002.pdf]

# BỘ CÂU HỎI NGHIÊN CỨU

## 1. THÔNG TIN CÁ NHÂN

| STT | Câu hỏi                                                                                                         | Câu trả lời                                                                                                                                                        | Ghi chú                                                                                                                                                         |
|-----|-----------------------------------------------------------------------------------------------------------------|--------------------------------------------------------------------------------------------------------------------------------------------------------------------|-----------------------------------------------------------------------------------------------------------------------------------------------------------------|
| A01 | Giới tính của bạn                                                                                               | Nam<br>Nữ                                                                                                                                                          | 1<br>2                                                                                                                                                          |
| A02 | Bạn là sinh viên năm thứ mấy?                                                                                   | Năm 1<br>Năm 2<br>Năm 3<br>Năm 4<br>Năm 5<br>Năm 6                                                                                                                 | 1<br>2<br>3<br>4<br>5<br>6<br>Khoanh tròn vào câu trả lời phù hợp                                                                                               |
| A03 | Hiện tại bạn đang sống với gia đình (bố mẹ, anh chị em hoặc ông bà, cô chú...) hay ở trọ (thuê nhà, ký túc xá)? | Sống với gia đình<br>Ở trọ 1 mình<br>Ở trọ với bạn                                                                                                                 | 1<br>2<br>3                                                                                                                                                     |
| A04 | Điểm trung bình trung học tập của bạn trong năm học vừa qua?                                                    | Học kỳ I: [ ][ ] . [ ][ ][ ]<br>Học kỳ II: [ ][ ] . [ ][ ][ ]                                                                                                      | Bạn vui lòng tham khảo <b>tờ bảng điểm</b> điều tra viên phát để điền số điểm chính xác<br><br>Bạn có thể điền <b>"99"</b> vào các ô mà bạn không nhớ chính xác |
| A05 | Điểm trung bình thi lâm sàng của bạn trong các năm học trước                                                    | Năm 3: [ ][ ] . [ ][ ][ ]<br>Năm 4: [ ][ ] . [ ][ ][ ]<br>Năm 5: [ ][ ] . [ ][ ][ ]                                                                                |                                                                                                                                                                 |
| A06 | Trong các năm vừa qua bạn có phải thi lại <b>lâm sàng</b> lần nào không?                                        | 1. Không<br>2. Có (vui lòng ghi rõ số môn)<br>Năm thứ 3: [ ][ ]<br>Năm thứ 4: [ ][ ]<br>Năm thứ 5: [ ][ ][ ]                                                       |                                                                                                                                                                 |
| A07 | Trong các năm vừa qua bạn có phải thi lại <b>lý thuyết</b> lần nào không?                                       | 1. Không<br>2. Có (vui lòng ghi rõ số môn)<br>Năm thứ 1: [ ][ ][ ]<br>Năm thứ 2: [ ][ ][ ]<br>Năm thứ 3: [ ][ ][ ]<br>Năm thứ 4: [ ][ ][ ]<br>Năm thứ 5: [ ][ ][ ] |                                                                                                                                                                 |

## 2. TÌNH HÌNH HỌC LÂM SÀNG

### 2.1. Động lực học tập

Bạn hãy sử dụng thang điểm dưới đây để đánh giá sự phù hợp của các nhận định sau về lý do tại sao bạn học đại học y.

| Hoàn toàn không phù hợp           | Phù hợp 1 chút                                                                                                                  | Phù hợp mức trung bình | Rất phù hợp | Hoàn toàn phù hợp |   |   |   |   |   |   |   |
|-----------------------------------|---------------------------------------------------------------------------------------------------------------------------------|------------------------|-------------|-------------------|---|---|---|---|---|---|---|
|                                   |                                                                                                                                 |                        |             |                   | 1 | 2 | 3 | 4 | 5 | 6 | 7 |
| STT                               | Câu hỏi                                                                                                                         | 1                      | 2           | 3                 | 4 | 5 | 6 | 7 |   |   |   |
| <b>Tại sao bạn học đại học y?</b> |                                                                                                                                 |                        |             |                   |   |   |   |   |   |   |   |
| B01                               | Bởi vì nếu chỉ có tấm bằng tốt nghiệp phổ thông thì sau này tôi sẽ không tìm được một công việc có mức lương cao                |                        |             |                   |   |   |   |   |   |   |   |
| B02                               | Bởi vì tôi cảm thấy thích thú và hài lòng khi học được những điều mới                                                           |                        |             |                   |   |   |   |   |   |   |   |
| B03                               | Bởi vì tôi nghĩ rằng giáo dục đại học sẽ giúp tôi chuẩn bị tốt hơn cho nghề nghiệp tôi chọn                                     |                        |             |                   |   |   |   |   |   |   |   |
| B04                               | Vì những cảm xúc mạnh mẽ tôi trải qua khi tôi nói về những ý tưởng của mình với người khác                                      |                        |             |                   |   |   |   |   |   |   |   |
| B05                               | Thành thực mà nói, tôi không biết tại sao tôi học y, tôi thật sự cảm thấy mình đang lãng phí thời gian ở trường đại học         |                        |             |                   |   |   |   |   |   |   |   |
| B06                               | Vì tôi cảm thấy thích thú khi vượt qua chính bản thân mình trong học tập                                                        |                        |             |                   |   |   |   |   |   |   |   |
| B07                               | Để chứng tỏ với bản thân mình rằng tôi có thể tốt nghiệp đại học                                                                |                        |             |                   |   |   |   |   |   |   |   |
| B08                               | Để sau này có được một công việc danh giá hơn                                                                                   |                        |             |                   |   |   |   |   |   |   |   |
| B09                               | Vì tôi cảm thấy thích thú khi khám phá ra những điều mới mẻ mà tôi chưa từng biết trước đây                                     |                        |             |                   |   |   |   |   |   |   |   |
| B10                               | Bởi vì cuối cùng học đại học sẽ giúp tôi tham gia vào thị trường việc làm trong lĩnh vực mà tôi thích                           |                        |             |                   |   |   |   |   |   |   |   |
| B11                               | Vì tôi cảm thấy thích thú khi tôi đọc những bài viết của những tác giả thú vị                                                   |                        |             |                   |   |   |   |   |   |   |   |
| B12                               | Tôi đã từng có những lý do chính đáng cho việc học đại học, nhưng bây giờ tôi đang băn khoăn liệu tôi có nên tiếp tục hay không |                        |             |                   |   |   |   |   |   |   |   |
| B13                               | Vì tôi cảm thấy thích thú với cảm giác vượt qua chính bản thân mình                                                             |                        |             |                   |   |   |   |   |   |   |   |

|     | Hoàn toàn không phù hợp                                                                                            | Phù hợp 1 chút | Phù hợp mức trung bình | Rất phù hợp | Hoàn toàn phù hợp |   |   |   |   |
|-----|--------------------------------------------------------------------------------------------------------------------|----------------|------------------------|-------------|-------------------|---|---|---|---|
|     | 1                                                                                                                  | 2              | 3                      | 4           | 5                 | 6 | 7 |   |   |
| STT | Câu hỏi                                                                                                            |                | 1                      | 2           | 3                 | 4 | 5 | 6 | 7 |
|     | khi đạt được một thành tựu cá nhân                                                                                 |                |                        |             |                   |   |   |   |   |
| B14 | Bởi vì thực tế là khi tôi thành công ở trường đại học, tôi cảm thấy mình quan trọng                                |                |                        |             |                   |   |   |   |   |
| B15 | Bởi vì tôi muốn có một cuộc sống tốt về sau                                                                        |                |                        |             |                   |   |   |   |   |
| B16 | Vì tôi cảm thấy thích thú khi được mở mang kiến thức về các môn học mà tôi thấy hấp dẫn                            |                |                        |             |                   |   |   |   |   |
| B17 | Bởi vì học đại học cho tôi thêm một sự lựa chọn tốt hơn khi định hướng nghề nghiệp                                 |                |                        |             |                   |   |   |   |   |
| B18 | Vì tôi cảm thấy thích thú khi tôi hoàn toàn say mê những gì một số tác giả viết ra                                 |                |                        |             |                   |   |   |   |   |
| B19 | Tôi không thể trả lời tại sao tôi lại đi học đại học và nói một cách thẳng thắn, tôi không quan tâm đến vấn đề này |                |                        |             |                   |   |   |   |   |
| B20 | Vì tôi cảm thấy hài lòng trong quá trình tôi hoàn thành những công việc học thuật khó                              |                |                        |             |                   |   |   |   |   |
| B21 | Để thể hiện cho bản thân tôi thấy tôi là một người thông minh                                                      |                |                        |             |                   |   |   |   |   |
| B22 | Để sau này được trả lương cao hơn                                                                                  |                |                        |             |                   |   |   |   |   |
| B23 | Bởi vì học đại học cho phép tôi tiếp tục học nhiều thứ tôi thích                                                   |                |                        |             |                   |   |   |   |   |
| B24 | Bởi vì tôi tin rằng việc học tập trong một vài năm tới sẽ giúp cải thiện khả năng làm việc của tôi                 |                |                        |             |                   |   |   |   |   |
| B25 | Vì cảm giác “lãng lãng” mà tôi có khi đọc về các chủ đề thú vị khác nhau                                           |                |                        |             |                   |   |   |   |   |
| B26 | Tôi không biết; tôi không thể hiểu tôi đang làm gì ở trường đại học                                                |                |                        |             |                   |   |   |   |   |
| B27 | Bởi vì trường đại học cho tôi trải nghiệm cảm giác thoải mái cá nhân khi theo đuổi sự xuất sắc trong học tập       |                |                        |             |                   |   |   |   |   |
| B28 | Bởi vì tôi muốn thể hiện cho bản thân tôi thấy tôi có thể thành công trong việc học tập                            |                |                        |             |                   |   |   |   |   |

## 2.2. Tình hình trực lâm sàng

| STT | Câu hỏi                                                               | Câu trả lời                                                            | Ghi chú               |
|-----|-----------------------------------------------------------------------|------------------------------------------------------------------------|-----------------------|
| F01 | Số buổi trực nhiều ảnh hưởng đến sức khỏe và khả năng học tập của bạn | Rất đồng ý<br>Đồng ý<br>Trung bình<br>Không đồng ý<br>Rất không đồng ý | 4<br>3<br>2<br>1<br>0 |

## 3. ĐÁNH GIÁ TÂM LÝ

### 3.1. Stress trong trường đại học

**Bạn hãy đưa ra nhận định của mình về các mệnh đề sau và đánh dấu X vào ô phù hợp**

| STT | Câu hỏi                                                                                                                                   | Rất không đồng ý | Không đồng ý | Trung bình | Đồng ý | Rất đồng ý |
|-----|-------------------------------------------------------------------------------------------------------------------------------------------|------------------|--------------|------------|--------|------------|
| H01 | Trường y khiến tôi tăng cảm giác mình không được ai biết đến và bị cô lập với các sinh viên khác                                          |                  |              |            |        |            |
| H02 | Tôi lo ngại mình sẽ không thể chịu đựng nhiều giờ học kéo dài và những trách nhiệm liên quan tới việc học và thực hành lâm sàng           |                  |              |            |        |            |
| H03 | Tôi không biết nhà trường mong đợi điều gì ở tôi                                                                                          |                  |              |            |        |            |
| H04 | Việc học y chiếm phần lớn thời gian của tôi và tôi có quá ít thời gian cho các hoạt động khác                                             |                  |              |            |        |            |
| H05 | Tôi lo ngại mình sẽ không thể nắm vững toàn bộ lượng kiến thức y khoa                                                                     |                  |              |            |        |            |
| H06 | Trường y này đang thúc đẩy bác sĩ nâng cao chuyên môn nhưng khiến họ mất đi cá tính và thời gian cho các mối quan tâm khác                |                  |              |            |        |            |
| H07 | Trường y cạnh tranh hơn tôi đã nghĩ                                                                                                       |                  |              |            |        |            |
| H08 | Rất nhiều nhân viên của trường có quan điểm là sinh viên thực tập nên tự tìm cách xoay sở khi gặp khó khăn                                |                  |              |            |        |            |
| H09 | Phần lớn sinh viên cảm thấy việc thành công ở trong trường y không phụ thuộc vào hệ thống quản lý và không phải do hệ thống đó            |                  |              |            |        |            |
| H10 | Trường y lạnh lùng, không tương thân tương ái và quan liêu không cần thiết                                                                |                  |              |            |        |            |
| H11 | Các quyết định về các môn học tự chọn và tua lâm sàng được dựa trên thông tin lấy từ những sinh viên khóa trước, không phải từ nhà trường |                  |              |            |        |            |
| H12 | Trường y mang tính đe dọa hơn là thách thức                                                                                               |                  |              |            |        |            |
| H13 | Các khoản chi tiêu cá nhân là một mối lo ngại của tôi                                                                                     |                  |              |            |        |            |

### 3.2. Đánh giá tâm lý khác

| STT                                                                                                                                                     | Câu hỏi                                                                                                                                           | Không có                         | Vài ngày                         | Quá nửa số ngày trong tuần          | Hầu như mọi ngày |
|---------------------------------------------------------------------------------------------------------------------------------------------------------|---------------------------------------------------------------------------------------------------------------------------------------------------|----------------------------------|----------------------------------|-------------------------------------|------------------|
| <b>Trong 2 TUẦN VỪA QUA, bạn thường xuyên gặp phải bất cứ một trong các vấn đề sau ở mức độ nào? Bạn hãy đánh dấu X vào ô phù hợp</b><br><b>PHQ-9</b>   |                                                                                                                                                   |                                  |                                  |                                     |                  |
| I01                                                                                                                                                     | Giảm thích thú hoặc hài lòng trong công việc                                                                                                      |                                  |                                  |                                     |                  |
| I02                                                                                                                                                     | Cảm thấy chán nản, trầm cảm hoặc tuyệt vọng                                                                                                       |                                  |                                  |                                     |                  |
| I03                                                                                                                                                     | Khó ngủ hoặc khó ngủ lâu, hoặc ngủ quá nhiều                                                                                                      |                                  |                                  |                                     |                  |
| I04                                                                                                                                                     | Cảm thấy mệt mỏi hoặc gần như kiệt sức                                                                                                            |                                  |                                  |                                     |                  |
| I05                                                                                                                                                     | Chán ăn hoặc ăn quá nhiều                                                                                                                         |                                  |                                  |                                     |                  |
| I06                                                                                                                                                     | Cảm thấy bản thân mình tồi tệ — hoặc cảm thấy mình vô dụng hay đã làm bản thân hoặc gia đình thất vọng                                            |                                  |                                  |                                     |                  |
| I07                                                                                                                                                     | Khó tập trung vào việc gì đó, chẳng hạn như đọc báo hoặc xem tivi                                                                                 |                                  |                                  |                                     |                  |
| I08                                                                                                                                                     | Di chuyển hoặc nói chậm đến mức người khác có thể nhận thấy? Hoặc ngược lại — quá bồn chồn hoặc bứt rứt đến nỗi chuyển động nhiều hơn bình thường |                                  |                                  |                                     |                  |
| I09                                                                                                                                                     | Nghĩ rằng mình nên chết quách đi cho xong hay muốn tự làm mình tổn thương theo cách nào đó                                                        |                                  |                                  |                                     |                  |
| <b>GAD-7</b>                                                                                                                                            |                                                                                                                                                   |                                  |                                  |                                     |                  |
| I10                                                                                                                                                     | Cảm thấy bồn chồn, lo lắng hoặc bất an                                                                                                            |                                  |                                  |                                     |                  |
| I11                                                                                                                                                     | Không thể ngưng hoặc kiểm soát sự lo lắng                                                                                                         |                                  |                                  |                                     |                  |
| I12                                                                                                                                                     | Lo lắng quá mức về nhiều thứ                                                                                                                      |                                  |                                  |                                     |                  |
| I13                                                                                                                                                     | Khó thư giãn                                                                                                                                      |                                  |                                  |                                     |                  |
| I14                                                                                                                                                     | Bứt rứt đến mức khó ngồi yên                                                                                                                      |                                  |                                  |                                     |                  |
| I15                                                                                                                                                     | Trở nên dễ bực bội hoặc cáu kỉnh                                                                                                                  |                                  |                                  |                                     |                  |
| I16                                                                                                                                                     | Cảm thấy lo lắng như thể điều gì khủng khiếp có thể xảy ra                                                                                        |                                  |                                  |                                     |                  |
| <b>Nếu bạn đã đánh dấu bất cứ vấn đề nào, đâu là mức độ mà chúng gây khó khăn cho bạn khi: làm việc, trông nom nhà cửa hoặc hòa hợp với người khác?</b> |                                                                                                                                                   |                                  |                                  |                                     |                  |
| I17                                                                                                                                                     | <input type="checkbox"/> Không khó chút nào                                                                                                       | <input type="checkbox"/> Hơi khó | <input type="checkbox"/> Rất khó | <input type="checkbox"/> Cực kỳ khó |                  |

#### 4. ĐÁNH GIÁ VỀ LỐI SỐNG

##### 4.1. Hoạt động thể lực

| STT                                                                                                                                                                                                                                                                                                                                                                                                                                                                                        | Câu hỏi                                                                                                                                                                               | Câu trả lời                                                                            | Ghi chú |
|--------------------------------------------------------------------------------------------------------------------------------------------------------------------------------------------------------------------------------------------------------------------------------------------------------------------------------------------------------------------------------------------------------------------------------------------------------------------------------------------|---------------------------------------------------------------------------------------------------------------------------------------------------------------------------------------|----------------------------------------------------------------------------------------|---------|
| <p>Chúng tôi quan tâm đến việc tìm ra những hình thức hoạt động thể lực mà mọi người làm trong cuộc sống hàng ngày. Các câu hỏi sẽ hỏi bạn về thời gian bạn đã sử dụng cho việc hoạt động thể lực trong vòng <b>7 NGÀY QUA</b>. Xin vui lòng trả lời từng câu hỏi mặc dù bạn có cho rằng bạn là một người ít hoạt động thể lực. Nghĩ tới các hoạt động thể lực tại nơi làm việc, công việc nhà, làm vườn đi lại, các hoạt động trong thời gian rảnh rỗi, giải trí và thể dục thể thao.</p> |                                                                                                                                                                                       |                                                                                        |         |
| <p>Hãy nghĩ tới tất cả các hoạt động <b>nặng nhọc</b> mà bạn đã thực hiện trong vòng <b>7 ngày qua</b>. Các hoạt động <b>nặng nhọc</b> bao gồm các hoạt động đòi hỏi gắng sức về mặt thể lực và làm bạn <b>thở hổn hển</b> hơn. <i>Chỉ</i> tính các hoạt động thể lực kéo dài <b>ít nhất 10 phút</b> một lần.</p>                                                                                                                                                                          |                                                                                                                                                                                       |                                                                                        |         |
| J01                                                                                                                                                                                                                                                                                                                                                                                                                                                                                        | Trong vòng <b>7 ngày qua</b> , có bao nhiêu ngày bạn đã thực hiện các hoạt động thể lực <b>nặng nhọc</b> như nâng vật nặng, đào đất, thể dục nhịp điệu hoặc đạp xe nhanh?             | Không hoạt động thể lực nặng nhọc <input type="checkbox"/><br>Số ngày trong tuần: [ ]  | → J03   |
| J02                                                                                                                                                                                                                                                                                                                                                                                                                                                                                        | Một trong những ngày đó, bạn thường dành bao nhiêu thời gian cho các hoạt động thể lực <b>nặng nhọc</b> ?                                                                             | Số giờ trong ngày: [ ] [ ]<br>Số phút trong ngày: [ ] [ ]<br>Không biết/Không chắc [ ] |         |
| <p>Nghĩ tới các hoạt động thể lực <b>vừa phải</b> mà bạn đã thực hiện trong vòng <b>7 ngày qua</b>. Hoạt động thể lực <b>vừa phải</b> bao gồm các hoạt động đòi hỏi cố gắng thể lực vừa phải và làm bạn <b>thở nhanh</b> hơn bình thường. <i>Chỉ</i> tính các hoạt động thể lực kéo dài <b>ít nhất 10 phút</b> một lần</p>                                                                                                                                                                 |                                                                                                                                                                                       |                                                                                        |         |
| J03                                                                                                                                                                                                                                                                                                                                                                                                                                                                                        | Trong vòng <b>7 ngày qua</b> , có bao nhiêu ngày bạn đã thực hiện các hoạt động thể <b>vừa phải</b> như nâng vật nhẹ, đạp xe ở tốc độ bình thường, chơi tennis đôi? Không tính đi bộ. | Không hoạt động thể lực vừa phải <input type="checkbox"/><br>Số ngày trong tuần: [ ]   | → J05   |
| J04                                                                                                                                                                                                                                                                                                                                                                                                                                                                                        | Một trong những ngày đó, bạn thường dành bao nhiêu thời gian cho các hoạt động thể lực <b>vừa phải</b> ?                                                                              | Số giờ trong ngày: [ ] [ ]<br>Số phút trong ngày: [ ] [ ]<br>Không biết/Không chắc [ ] |         |
| <p>Nghĩ tới thời gian mà bạn <b>đi bộ</b> trong <b>vòng 7 ngày qua</b>. Bao gồm ở nơi làm việc, ở nhà, khi <b>di chuyển</b> từ chỗ này đến chỗ kia hoặc bất cứ hoạt động đi bộ bạn thực hiện cho giải trí, thể dục thể thao hay các công việc trong lúc rảnh rỗi.</p>                                                                                                                                                                                                                      |                                                                                                                                                                                       |                                                                                        |         |
| J05                                                                                                                                                                                                                                                                                                                                                                                                                                                                                        | Trong vòng <b>7 ngày qua</b> , có bao nhiêu ngày bạn đã <b>đi bộ</b> kéo dài ít nhất 10 phút?                                                                                         | Không đi bộ <input type="checkbox"/><br>Số ngày trong tuần: [ ]                        | → J07   |
| J06                                                                                                                                                                                                                                                                                                                                                                                                                                                                                        | Một trong những ngày đó, bạn thường dành bao nhiêu thời gian <b>đi bộ</b> ?                                                                                                           | Số giờ trong ngày: [ ] [ ]<br>Số phút trong ngày: [ ] [ ]<br>Không biết/Không chắc [ ] |         |
| <p>Câu cuối cùng hỏi về thời gian bạn sử dụng cho việc <b>ngồi</b> trong những ngày làm việc trong vòng <b>7 ngày qua</b>. Bao gồm thời gian dành cho công việc, ở nhà, trong lúc học tập và trong thời gian rảnh. Bao gồm cả thời gian dành cho việc ngồi bàn giấy, thăm bạn bè, đọc sách hay ngồi và nằm xem TV.</p>                                                                                                                                                                     |                                                                                                                                                                                       |                                                                                        |         |
| J07                                                                                                                                                                                                                                                                                                                                                                                                                                                                                        | Trong vòng <b>7 ngày qua</b> , bạn dành bao nhiêu thời gian cho việc <b>ngồi</b> trong một <b>ngày làm việc</b> ?                                                                     | Số giờ trong ngày: [ ] [ ]<br>Số phút trong ngày: [ ] [ ]<br>Không biết/Không chắc [ ] |         |

#### 4.2. Đánh giá về hút thuốc

| STT | Câu hỏi                                                                                      | Câu trả lời |   | Ghi chú |
|-----|----------------------------------------------------------------------------------------------|-------------|---|---------|
| K01 | Hiện tại bạn có đang hút thuốc lá hoặc thuốc lá không?                                       | Không       | 0 |         |
|     |                                                                                              | Có          | 1 |         |
| K02 | Trước đây bạn có bao giờ hút thuốc lá/thuốc lá thường xuyên không?<br>(ít nhất 02 điếu/ngày) | Không       | 0 | → L01   |
|     |                                                                                              | Có          | 1 |         |

#### 4.3. Đánh giá về sử dụng đồ uống có cồn

| STT | Câu hỏi                                                                                 | Câu trả lời |   | Ghi chú    |
|-----|-----------------------------------------------------------------------------------------|-------------|---|------------|
| L01 | Bạn có thường xuyên uống rượu hoặc bia nhiều hơn 1 lần/tháng HOẶC 12 lần/năm hay không? | Không       | 0 | → Kết thúc |
|     |                                                                                         | Có          | 1 |            |

*Xin chân thành cảm ơn bạn đã tham gia phỏng vấn!*
